# Supplementary material for: Reduced FBXW7 expression in pancreatic cancer correlates with poor prognosis and chemotherapeutic resistance via accumulation of MCL1
Source: PubMed Central journal article supplement (PMC5762537; doi:10.18632/oncotarget.22634), 2017-11-06
Supplement: oncotarget-08-112636-s001.pdf [file oncotarget-08-112636-s001.pdf]

## Reduced FBXW7 expression in pancreatic cancer correlates with poor prognosis and chemotherapeutic resistance via accumulation of MCL1

### SUPPLEMENTARY MATERIALS

**Supplementary Table 1: Univariate and multivariate analyses of variables related to relapse-free survival, as determined using Cox proportional hazards models**

| Variables                                         | Univariate analysis |           |                 | Multivariate analysis |           |                 |
|---------------------------------------------------|---------------------|-----------|-----------------|-----------------------|-----------|-----------------|
|                                                   | HR                  | 95% CI    | <i>p</i> -value | HR                    | 95% CI    | <i>p</i> -value |
| Age (< 70 versus ≥ 70)                            | 1.02                | 0.67–1.54 | 0.921           | -                     | -         | -               |
| Sex (male versus female)                          | 0.98                | 0.65–1.48 | 0.928           | -                     | -         | -               |
| Histological type (well versus moderately/poorly) | 1.55                | 0.87–3.03 | 0.139           | -                     | -         | -               |
| T factor (UICC) (T1, 2 versus T3, 4)              | 2.92                | 1.31–8.32 | 0.006*          | 1.32                  | 0.57–3.85 | 0.545           |
| Lymph node metastasis (absent versus present)     | 1.33                | 0.83–2.25 | 0.243           | -                     | -         | -               |
| Venous invasion (v0,1 versus v2,3)                | 2.14                | 1.40–3.30 | < 0.001*        | 2.09                  | 1.28–3.51 | 0.004*          |
| Lymphatic invasion (ly 0,1 versus ly 2,3)         | 1.58                | 1.04–2.42 | 0.031*          | 1.08                  | 0.67–1.75 | 0.753           |
| Perineural invasion (ne 0,1 versus ne 2,3)        | 1.55                | 0.97–2.59 | 0.07            | -                     | -         | -               |
| FBXW7 (high versus low)                           | 1.56                | 1.02–2.39 | 0.039*          | 1.55                  | 1.01–2.37 | 0.047*          |

Abbreviations: HR, hazard ratio; CI, confidence interval; UICC, Union for International Cancer Center, \**p* < 0.05.

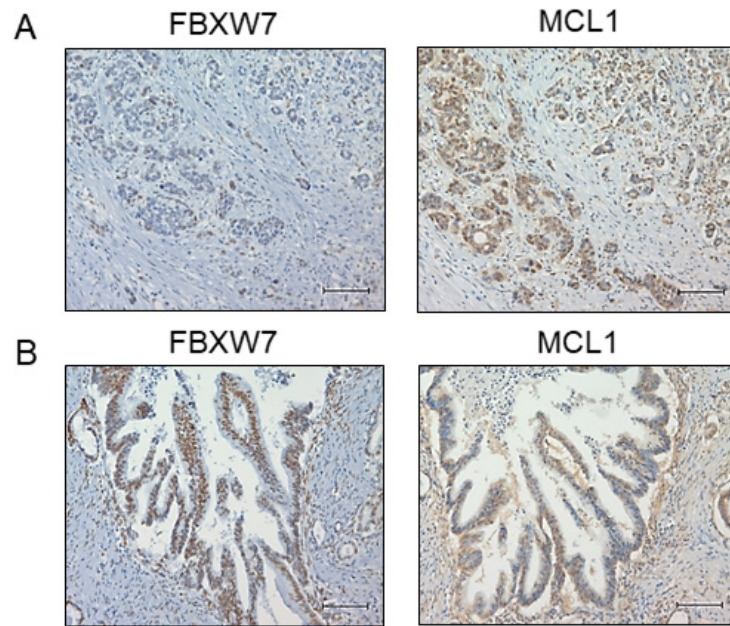

**Supplementary Figure 1: Relationship between FBXW7 expression and MCL1 expression, as determined by immunohistochemistry.**(A) Low FBXW7 expression in tumors was associated with enhanced MCL1 expression. (B) High FBXW7 expression in tumors was associated with decreased MCL1 expression. All scar bars are 100  $\mu$ m.

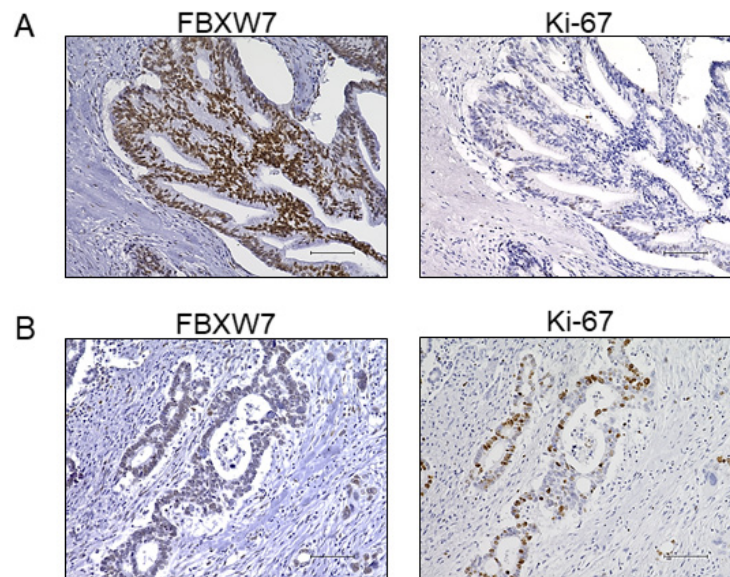

**Supplementary Figure 2: Relationship between FBXW7 expression and Ki-67 expression, as determined by immunohistochemistry.**Ki-67 expression was inversely correlated with FBXW7 expression. (A) High FBXW7 expression was associated with low Ki-67 expression. (B) Low FBXW7 expression was associated with high Ki-67 expression. All scar bars are 100  $\mu$ m.
